# Supplementary material for: Etiology, Risk Factors, and Biomarkers in Systemic Sclerosis with Interstitial Lung Disease
Source: PubMed Central journal article supplement — Am J Respir Crit Care Med. 2020 Mar 15;201(6):650–60. doi: 10.1164/rccm.201903-0563CI (PMC7068837; doi:10.1164/rccm.201903-0563ci), 2020-03-15
Supplement: rccm.201903-0563CI_khanna_data_supplement.pdf [file rccm.201903-0563CI_khanna_data_supplement.pdf]

# **Aetiology, Risk Factors, and Biomarkers in Systemic Sclerosis with Interstitial Lung Disease**

Dinesh Khanna, Donald P. Tashkin, Christopher P. Denton, Elisabetta A. Renzoni,  
Sujal R. Desai, and John Varga

ONLINE DATA SUPPLEMENT

## Online Data Supplement

**Table E1.** Statistically Significant Associations Between SSc-ILD and HLA Alleles: Studies with Ssc-ILD Cohorts  $\geq$  100 Patients (E1). Adapted by permission from Nature: Springer Nature. *Eur J Hum Genet*. Genetic predictors of systemic sclerosis-associated interstitial lung disease: a review of recent literature. Stock CJW, Renzoni EA. COPYRIGHT (2018). This table is excluded from the Open Access license; permission must be obtained from Springer Nature for its reuse.

| HLA region  | Allele/Serotype | OR and P Value for SSc-ILD                                    | Population  | Cohort Size          |
|-------------|-----------------|---------------------------------------------------------------|-------------|----------------------|
| <i>DPB1</i> | 301             | OR = 3.56 (1.27–10.73)*<br>$P = 0.0069$                       | Han Chinese | 199/78 <sup>†</sup>  |
|             | 1301            | OR = 2.25 (1.4–3.62) <sup>‡</sup><br>$P = 3.3 \times 10^{-4}$ |             |                      |
| <i>DQB1</i> | 501             | OR = 5.03 <sup>‡</sup><br>$P = 6 \times 10^{-7}$              | Han Chinese | 134/239 <sup>§</sup> |
| <i>DRB1</i> | 3               | OR = 2.47 (1.35–4.52) <sup>‡</sup><br>$P = 0.0026$            | Han Chinese | 295/458 <sup>§</sup> |

*Definition of abbreviations:* HLA = human leukocyte antigen; ILD = interstitial lung disease; OR = odds ratio; SSc = systemic sclerosis; SSc-ILD = systemic sclerosis-associated interstitial lung disease.

\*Versus SSc-no ILD.

<sup>†</sup>SSc-ILD/SSc-no ILD.

<sup>‡</sup>Versus control.

<sup>§</sup>SSc-ILD/control.

**Table E2.** Statistically Significant Associations Between SSc-ILD and Non-HLA Genes: Studies with SSc-ILD Cohorts  $\geq$  100 Patients (E1). Adapted by permission from Nature: Springer Nature. *Eur J Hum Genet*. Genetic predictors of systemic sclerosis-associated interstitial lung disease: a review of recent literature. Stock CJW, Renzoni EA. COPYRIGHT (2018). This table is excluded from the Open Access licence; permission must be obtained from Springer Nature for its reuse.

| Gene  | Polymorphism                                               | Function                                                                       | OR and P Value for SSc-                                |                                                                                          |                        |
|-------|------------------------------------------------------------|--------------------------------------------------------------------------------|--------------------------------------------------------|------------------------------------------------------------------------------------------|------------------------|
|       |                                                            |                                                                                | ILD                                                    | Population                                                                               | Cohort Size            |
| CD226 | rs763361:T>A                                               | –                                                                              | OR = 1.27<br>(1.12–1.45)*<br>$P = 2.98 \times 10^{-4}$ | French,<br>German,<br>Italian <sup>†</sup>                                               | 662/1642 <sup>‡</sup>  |
|       | Haplotype rs763361:T>A,<br>rs34794968:C>A,<br>rs727088:G>A | Correlates with<br>expression levels<br>in<br>T cells                          | OR = 1.27<br>(1.05–1.54)*<br>$P = 0.032$               | Spanish,<br>German,<br>Dutch, Italian,<br>Swedish,<br>British,<br>Norwegian <sup>†</sup> | 729/3,966 <sup>‡</sup> |
| CTGF  | rs918698:G>C                                               | Alters ratio of<br>Sp1:Sp3 binding<br>affecting<br>transcriptional<br>activity | OR = 3.1<br>(1.9–5.0)*<br>$P = 0.001$                  | British                                                                                  | 207/500 <sup>‡</sup>   |
|       | rs6918698:G>C                                              | See above                                                                      | OR = 2.0<br>(1.5–2.6)*<br>$P = 0.001$                  | Japanese                                                                                 | 188/269 <sup>‡</sup>   |

|                                                                   |                                                                  |                                                            |                                                         |                                                    |                           |                      |
|-------------------------------------------------------------------|------------------------------------------------------------------|------------------------------------------------------------|---------------------------------------------------------|----------------------------------------------------|---------------------------|----------------------|
| IRAK1                                                             | rs1059702:A>G/<br>rs1059703:G>A<br>(in complete LD)              | Increased NFκ-B<br>activity                                | OR = 1.37<br>(1.16–1.62)*                               | French, Italian,<br>German <sup>†</sup>            | 604/2,217 <sup>‡</sup>    |                      |
|                                                                   |                                                                  |                                                            | $P = 1.99 \times 10^{-4}$                               | (Female only)                                      |                           |                      |
|                                                                   | rs1059702:A>G/<br>rs1059703:G>A<br>(in complete LD)              | See above                                                  | OR = 1.30<br>(1.07–1.58)*                               | Spanish,<br>German,<br>Dutch, British <sup>†</sup> | 461/2,043 <sup>‡</sup>    |                      |
|                                                                   |                                                                  |                                                            | $P = 8.46 \times 10^{-3}$                               | (Female only)                                      |                           |                      |
|                                                                   | rs1059702:A>G/<br>rs1059703:G>A<br>(in complete LD) <sup>§</sup> | See above                                                  | OR = 1.2<br>(1.05–1.37) <sup>  </sup>                   | European<br>descent <sup>†</sup>                   | 1,065/2,237 <sup>  </sup> |                      |
|                                                                   |                                                                  |                                                            | $P = 0.007$                                             |                                                    |                           |                      |
|                                                                   | <hr/>                                                            |                                                            |                                                         |                                                    |                           |                      |
|                                                                   | IRF5                                                             | rs2004640:G>T                                              | Results in<br>transcription of<br>alternative exon<br>1 | OR = 1.44<br>(1.19–1.76)*                          | French                    | 280/760 <sup>‡</sup> |
|                                                                   |                                                                  | rs2004640:G>T                                              | See above                                               | OR = 1.38<br>(1.1–1.75)*                           | Han Chinese               | 502/227 <sup>‡</sup> |
|                                                                   |                                                                  |                                                            | $P = 0.028$                                             |                                                    |                           |                      |
| Haplotype<br>rs3757385:G>T –<br>rs2004640:G>T –<br>rs10954213:G>A |                                                                  | In LD with 5-bp<br>indel which<br>increases SP1<br>binding | OR = 0.64<br>(0.51–0.79)*                               | French                                             | 292/989 <sup>‡</sup>      |                      |
| rs4728142:G>A                                                     |                                                                  | Associated with<br>lower expression                        | Mean<br>difference =<br>2.64<br>(0.43–4.84)             | American<br>Caucasian                              | 914 <sup>**</sup>         |                      |
|                                                                   |                                                                  |                                                            |                                                         |                                                    |                           |                      |
|                                                                   |                                                                  |                                                            |                                                         |                                                    |                           |                      |
|                                                                   |                                                                  |                                                            |                                                         |                                                    |                           |                      |
|                                                                   |                                                                  |                                                            |                                                         |                                                    |                           |                      |

|              |                            |           |                                                                      |                                                       |                                                   |
|--------------|----------------------------|-----------|----------------------------------------------------------------------|-------------------------------------------------------|---------------------------------------------------|
|              |                            |           | $P = 0.019$                                                          |                                                       | (Linear regression analysis with FVC % predicted) |
|              | rs2004640:G>T <sup>§</sup> | See above | OR = 1.12<br>(1.02–1.22) <sup>  </sup>                               | French, European, Caucasian, Han Chinese <sup>†</sup> | 1,682/2,806 <sup>¶</sup>                          |
|              |                            |           | $P = 0.014$                                                          |                                                       |                                                   |
| <i>NLRP1</i> | rs8182352:T>C              | –         | OR = 1.19<br>(1.05–1.36)*<br>$P = 0.0065$                            | French, German, Italian <sup>†</sup>                  | 674/1,587 <sup>‡</sup>                            |
| <i>STAT4</i> | rs7574865:T>G              | –         | OR = 1.42<br>(1.16–1.73)*<br>$P = 0.008$                             | French                                                | 316/970 <sup>‡</sup>                              |
|              | rs7574865:T>G              | –         | OR = 1.86<br>(1.34–2.59)*<br>$P = 1.2 \times 10^{-4}$                | Han Chinese                                           | 237/534 <sup>‡</sup>                              |
|              | rs7574865:T>G <sup>§</sup> | –         | OR = 1.259<br>(1.07–1.47) <sup>  </sup><br>$P = 5.35 \times 10^{-3}$ | French, Spanish, Han Chinese <sup>†</sup>             | 640/842 <sup>¶</sup>                              |
|              | rs10168266:C>T             | –         | OR = 1.73<br>(1.24–2.41)<br>$P = 7.7 \times 10^{-4}$                 | Han Chinese                                           | 237/534 <sup>‡</sup>                              |
|              | rs3821236:G>A              | –         | OR = 1.54<br>(1.07–2.22)*<br>$P = 0.015$                             | Han Chinese                                           | 237/534 <sup>‡</sup>                              |

|                                              |   |                                        |                  |                      |
|----------------------------------------------|---|----------------------------------------|------------------|----------------------|
| Unreplicated studies with small cohort sizes | – | OR = 1.45<br>(1.17–1.79) <sup>ll</sup> | European descent | 439/399 <sup>¶</sup> |
| ALOX5AP rs10507391:A>T                       |   |                                        |                  |                      |
| (NC_000013.11:<br>g_30737959A>T)             |   | P = 0.0006                             |                  |                      |

---

*Definition of abbreviations:* ALOX5AP = arachidonate 5-lipoxygenase activating protein; bp = base pairs; CTGF = connective tissue growth factor; FVC = forced vital capacity; CD226 = cluster of differentiation 226; HLA = human leukocyte antigen; ILD = interstitial lung disease; IRAK1= Interleukin-1 receptor-associated kinase 1; IRF5 = interferon Regulatory Factor 5; LD, linkage disequilibrium; NFκβ = nuclear factor κβ; NLRP1 = NLR family pyrin domain containing 1; OR = odds ratio; SSc = systemic sclerosis; STAT4 = signal transducer and activator of transcription 4; SSc-ILD = systemic sclerosis-associated interstitial lung disease.

Corrected *P* values given where available. ORs are shown as OR (95% confidence interval), 517 where available.

\*Versus control.

†Meta-analysis of the different populations 519 included.

‡SSc-ILD/control.

§Meta-analysis or previously published studies.

||Versus SSc-no ILD.

¶SSc-ILD/SSc-no ILD.

\*\*Total number of SSc patients 518, when SSc-ILD number not given.

**Table E3.** Levels of Serum Biomarkers in SSc-ILD: Comparison with Healthy Controls, Ssc Without ILD and IPF. Significant Differences Between Study Groups Were Only Seen with Respect to KL-6, SP-D and MMP7 (the Kruskal–Wallis Test was Used to Assess for Differences Across the Four Groups) (E2). Data are presented as median (interquartile range). Reprinted with permission of Mattioli 1885: Kennedy B et al. Biomarkers to identify ILD and predict lung function decline in scleroderma lung disease or idiopathic pulmonary fibrosis. *Sarcoidosis Vasc Diffuse Lung Dis.* 2015; 32: 228–236.

|                        | Controls             | SSc w/o ILD         | SSc-ILD              | IPF                 | P Value             |
|------------------------|----------------------|---------------------|----------------------|---------------------|---------------------|
| KL-6 (ng/ml)           | 198 (52–360)         | 192 (0–525)         | 836 (431–1303)       | 633 (492–1,675)     | 0.0003*             |
| SP-D (ng/ml)           | 137 (97–284)         | 169 (137–219)       | 398 (190–727)        | 542 (305–577)       | 0.0012 <sup>†</sup> |
| MMP7 (ng/ml)           | 0 (0–0.06)           | 2.36 (1.2–5.1)      | 5.4 (2.6–7.25)       | 2.85 (1.5–3.6)      | 0.0009 <sup>‡</sup> |
| TGF-β (pg/ml)          | 7,251 (5,654–10,034) | 2,986 (2,483–4,029) | 3,743 (1,855–5,500)  | 2,388 (1,501–7,367) | 0.07                |
| CCL18 (ng/ml)          | 46.85 (34.6–153.1)   | 49.1 (43.65–65.05)  | 62.05 (52.3–137.4)   | 48.4 (36.8–90.5)    | 0.58                |
| PDGF-AA (pg/ml)        | 1,011 (605–2,989)    | 437 (314.5–649)     | 554 (328–935)        | 405 (167.5–1,222)   | 0.057               |
| TNF-α (pg/ml)          | 2.73 (2.18–3.39)     | 2.53 (2.43–3.21)    | 3.41 (2.24–10.06)    | 2.78 (1.9–5.3)      | 0.84                |
| VEGF (pg/ml)           | 60.32 (23.3–209.6)   | 22.9 (11.88–29.28)  | 24.96 (20.5–33.46)   | 24.14 (11.45–37.28) | 0.053               |
| Thrombomodulin (ng/ml) | 3.07 (1.84–4.45)     | 1.36 (1.1–2.57)     | 1.63 (1.05–3.07)     | 2.57 (1.72–6.2)     | 0.054               |
| PAI-1 (ng/ml)          | 37.2 (26.7–61.35)    | 21.3 (9.15–41.95)   | 40.55 (21.55–56.5)   | 32.7 (15.75–56.2)   | 0.35                |
| VCAM-1 (ng/ml)         | 467.5 (397.1–686.6)  | 700.1 (567–969.5)   | 706.1 (583.2–801.3)  | 753.7 (444.5–916.3) | 0.12                |
| ICAM-1 (ng/ml)         | 297.7 (206.5–742.7)  | 259.5 (210.4–361.8) | 431.4 (325.3–504.80) | 416 (289.7–569.1)   | 0.18                |

|                    |                     |                    |                     |                     |      |
|--------------------|---------------------|--------------------|---------------------|---------------------|------|
| P-Selectin (ng/ml) | 168.5 (91.35–224.6) | 131.3 (110–137.3)  | 133.9 (115.4–167.1) | 119.1 (100.9–170.3) | 0.51 |
| L-Selectin (ng/ml) | 1,397 (914.3–1,878) | 1,385 (1,032–1679) | 1329 (818.1–1746)   | 1,203 (891.4–1,784) | 0.9  |
| CCL2 (pg/ml)       | 84.9 (78.3–121.1)   | 86.7 (43.85–121.7) | 145.2 (118.8–189.5) | 159.4 (103.7–180.3) | 0.06 |

---

CCL = chemokine (C-C motif) ligand; ICAM-1 = Intercellular Adhesion Molecule 1; IL = interleukin; KL-6 = Krebs von den lugen-6; MMP = matrix metalloproteinase; Pal-1 = Plasminogen activator inhibitor-1; PDGF-AA = Platelet Derived Growth Factor AA; SP-A = surfactant protein A; TGF- $\beta$  = Tumor growth factor beta; TNF- $\alpha$  = tumor necrosis factor alpha ; VCAM-1 = vascular cell adhesion molecule 1; VEGF = vascular endothelial growth factor



**Table E4.** Comparison of Clinical and Mechanistic Features of SSc-ILD and IPF

| Feature of Comparison    | SSc-ILD                                                                                                                                                                                                                                                                                                 | IPF                                                                                                                                                                                                                                                                                            |
|--------------------------|---------------------------------------------------------------------------------------------------------------------------------------------------------------------------------------------------------------------------------------------------------------------------------------------------------|------------------------------------------------------------------------------------------------------------------------------------------------------------------------------------------------------------------------------------------------------------------------------------------------|
| Lung involvement         | Lung fibrosis occurs in ~80% of patients with SSc, 25–30% of whom develop progressive ILD (E3).                                                                                                                                                                                                         | All patients develop characteristic progressive lung fibrosis (E4, E5)                                                                                                                                                                                                                         |
| Pulmonary symptoms       | Dyspnea on exertion, nonproductive cough and predominantly basal inspiratory crackles on auscultation (E6, E7, E8)                                                                                                                                                                                      | Dyspnea on exertion, non-productive cough and predominantly basal inspiratory crackles on auscultation (E6, E5)                                                                                                                                                                                |
| Extra-pulmonary features | Multisystem characteristics of SSc (e.g., vasculopathy, Raynaud’s phenomenon, immune dysfunction, skin fibrosis, gastro-esophageal reflux) (E3, E9, E10)                                                                                                                                                | Digital clubbing (E6)                                                                                                                                                                                                                                                                          |
| Clinical course          | Variable rate of progression (some patients show rapid, early decline; disease course may be stabilized by treatment with immunosuppressants; spontaneous regression can occur [albeit infrequently]); median survival is 5–8 years (E6, E11)                                                           | Progressive decline in lung function; spontaneous regression never occurs and the disease is unlikely to respond to immunosuppressant therapy; median survival is 2–3 years (E6, E4)                                                                                                           |
| Disease mechanisms       | Repetitive endothelial/epithelial cell injury leads to activation of innate and adaptive immune system, recruitment and activation of fibroblasts, and differentiation of fibroblasts to a myofibroblast phenotype, accumulation of ECM and development of fibrosis (E7, E12–E14). Increased numbers of | Similar to SSc-ILD, fibroblast activation, proliferation and differentiation into myofibroblasts culminates in excess deposition of ECM (E18, E14). However, unlike SSc-ILD, mast cell density is increased versus healthy controls and no increases in CD4+CD25+ regulatory T-cells or IL-22- |

|                            |                                                                                                                                                                                                                                                        |                                                                           |
|----------------------------|--------------------------------------------------------------------------------------------------------------------------------------------------------------------------------------------------------------------------------------------------------|---------------------------------------------------------------------------|
|                            | CD4+CD25+ regulatory T-cells and IL-22-producing T-helper cells (E15, E16); mast cell density similar to healthy controls (E17).                                                                                                                       | producing T-helper cells are observed (E17, E19, E20).                    |
| Autoimmune characteristics | Most patients are positive for antinuclear antibodies and other specific autoantibodies (E6).                                                                                                                                                          | No clinically relevant levels of autoantibodies (E6)                      |
| Radiographic features      | NSIP pattern is typical, including ground-glass opacities with areas of subpleural sparing, reticular markings and traction bronchiectasis. UIP observed in a minority of patients, with honeycombing of lower prominence compared with IPF (E6, E22). | UIP pattern with honeycombing; ground-glass opacities not seen (E6, E21). |

*Definition of abbreviations:* ECM, extracellular matrix; IL = interleukin; ILD = interstitial lung disease; IPF = idiopathic pulmonary fibrosis; NSIP = nonspecific interstitial pneumonia; SSc = systemic sclerosis; UIP = usual interstitial pneumonia.

## References

- E1. Stock CJW, Renzoni EA. Genetic predictors of systemic sclerosis-associated interstitial lung disease: a review of recent literature. *Eur J Hum Genet* 2018;26:765–777.
- E2. Kennedy B, Branagan P, Moloney F, Haroon M, O’Connell OJ, O’Connor TM, *et al.* Biomarkers to identify ILD and predict lung function decline in scleroderma lung disease or idiopathic pulmonary fibrosis. *Sarcoidosis Vasc Diffuse Lung Dis* 2015;32:228–236.
- E3. Denton CP, Khanna D. Systemic sclerosis. *Lancet* 2017;390:1685–1699.
- E4. Sharif R. Overview of idiopathic pulmonary fibrosis (IPF) and evidence-based guidelines. *Am J Manag Care* 2017;23:S176–S182.
- E5. Martinez FJ, Collard HR, Pardo A, Raghu G, Richeldi L, Selman M, *et al.* Idiopathic pulmonary fibrosis. *Nat Rev Dis Primers* 2017;3:17074.
- E6. Herzog EL, Mathur A, Tager AM, Feghali-Bostwick C, Schneider F, Varga J. Review: interstitial lung disease associated with systemic sclerosis and idiopathic pulmonary fibrosis: how similar and distinct? *Arthritis Rheumatol* 2014;66:1967–1978.
- E7. Cappelli S, Bellando Randone S, Camiciottoli G, De Paulis A, Guiducci S, Matucci-Cerinic M. Interstitial lung disease in systemic sclerosis: where do we stand? *Eur Respir Rev* 2015;24:411–419.
- E8. Wells AU, Steen V, Valentini G. Pulmonary complications: one of the most challenging complications of systemic sclerosis. *Rheumatology (Oxford)* 2009;48:iii40–iii44.
- E9. Denton CP, Hughes M, Gak N, Vila J, Buch MH, Chakravarty K, *et al.*; BSR and BHPR Standards, Guidelines and Audit Working Group. BSR and BHPR guideline for the treatment of systemic sclerosis. *Rheumatology (Oxford)* 2016;55:1906–1910.
- E10. Khanna D, Tashkin DP, Denton CP, Lubell MW, Vazquez-Mateo C, Wax S. Ongoing clinical trials and treatment options for patients with systemic sclerosis-associated interstitial lung disease. *Rheumatology (Oxford)* 2019;58:567–579.

- E11. Kim HJ, Tashkin DP, Gjerdtson DW, Brown MS, Kleerup E, Chong S, *et al.* Transitions to different patterns of interstitial lung disease in scleroderma with and without treatment. *Ann Rheum Dis* 2016;75: 1367–1371.
- E12. Akter T, Silver RM, Bogatkevich GS. Recent advances in understanding the pathogenesis of scleroderma-interstitial lung disease. *Curr Rheumatol Rep* 2014;16:411.
- E13. Giacomelli R, Liakouli V, Berardicurti O, Ruscitti P, Di Benedetto P, Carubbi F, *et al.* Interstitial lung disease in systemic sclerosis: current and future treatment. *Rheumatol Int* 2017;37:853–863.
- E14. Usategui A, del Rey MJ, Pablos JL. Fibroblast abnormalities in the pathogenesis of systemic sclerosis. *Expert Rev Clin Immunol* 2011;7: 491–498.
- E15. Frantz C, Auffray C, Avouac J, Allanore Y. Regulatory T cells in systemic sclerosis. *Front Immunol* 2018;9:2356.
- E16. Truchetet ME, Brembilla NC, Montanari E, Allanore Y, Chizzolini C. Increased frequency of circulating Th22 in addition to Th17 and Th2 lymphocytes in systemic sclerosis: association with interstitial lung disease. *Arthritis Res Ther* 2011;13:R166.
- E17. Cha SI, Chang CS, Kim EK, Lee JW, Matthay MA, Golden JA, *et al.* Lung mast cell density defines a subpopulation of patients with idiopathic pulmonary fibrosis. *Histopathology* 2012;61:98–106.
- E18. Bagnato G, Harari S. Cellular interactions in the pathogenesis of interstitial lung diseases. *Eur Respir Rev* 2015;24:102–114.
- E19. Hou Z, Ye Q, Qiu M, Hao Y, Han J, Zeng H. Increased activated regulatory T cells proportion correlate with the severity of idiopathic pulmonary fibrosis. *Respir Res* 2017;18:170.
- E20. Wilson MS, Madala SK, Ramalingam TR, Gochuico BR, Rosas IO, Cheever AW, *et al.* Bleomycin and IL-1beta-mediated pulmonary fibrosis is IL-17A dependent. *J Exp Med* 2010;207:535–552.
- E21. Song JW, Do KH, Kim MY, Jang SJ, Colby TV, Kim DS. Pathologic and radiologic differences between idiopathic and collagen vascular disease-related usual interstitial pneumonia. *Chest* 2009;136:23–30.

E22. Cavazza A, Rossi G, Carbonelli C, Spaggiari L, Paci M, Roggeri A. The role of histology in idiopathic pulmonary fibrosis: an update. *Respir Med* 2010;104:S11–S22.
